# Supplementary material for: Genome-Wide Association Study Reveals the Genetic Basis of Chilling Tolerance in Rice at the Reproductive Stage
Source: Plants (Basel). 2021 Aug 20;10(8):1722. doi: 10.3390/plants10081722 (PMC8398597; doi:10.3390/plants10081722)
Supplement: Supplementary file 1 [file plants-10-01722-s001.zip › Supplymentary table 1.pdf]

Supplementary table 1. A core Korean rice collection, 117 accessions.

| Resource | Name                 | Ecotype            | Classification | Fertility |
|----------|----------------------|--------------------|----------------|-----------|
| RWG-023  | Hanyangjo            | Aus                | Landrace       | 55.10204  |
| RWG-122  | ChungdoHwayang12     | Indica             | Weedy          | 45.63267  |
| RWG-021  | Saducho              | Indica             | Landrace       | 41.25879  |
| RWG-079  | Gou 405              | Temperate japonica | Intro          | 40.7274   |
| RWG-102  | Sando                | Tropical japonica  | Landrace       | 38.44957  |
| RWG-035  | BELLARDONE           | Temperate japonica | Intro          | 38.09754  |
| RWG-098  | NeulByeo             | Tropical japonica  | Landrace       | 38.0609   |
| RWG-067  | XI GUA BAI           | Indica             | Intro          | 36.732    |
| RWG-031  | Mongdonjaera         | admixture          | Landrace       | 36.50496  |
| RWG-018  | Sando                | Tropical japonica  | Landrace       | 36.09023  |
| RWG-048  | Yangmyeon            | Indica             | Intro          | 34.62879  |
| RWG-050  | Pyeongbuk3           | Temperate japonica | Intro          | 34.53018  |
| RWG-059  | DoanGuangHwaLue      | Temperate japonica | Intro          | 33.79592  |
| RWG-004  | SUWON 301            | Temperate japonica | Bred           | 32.58166  |
| RWG-078  | Hwaseong-5           | Temperate japonica | Weedy          | 31.12169  |
| RWG-015  | Muando               | Temperate japonica | Landrace       | 31.03081  |
| RWG-003  | SUWEON 255           | Indica             | Bred           | 30.61265  |
| RWG-066  | URASAN               | Tropical japonica  | Intro          | 29.96484  |
| RWG-008  | TCHAMPA              | Aus                | Intro          | 29.6875   |
| RWG-125  | Jangseong 1          | Indica             | Weedy          | 29.09408  |
| RWG-090  | Jejubukjeju-2002-115 | Tropical japonica  | Weedy          | 29.01577  |
| RWG-118  | TSONG-GAN-SHUN       | Indica             | Intro          | 28.50242  |
| RWG-028  | Yuljojo              | Temperate japonica | Landrace       | 27.12121  |
| RWG-060  | WuCyue               | Indica             | Intro          | 26.74715  |
| RWG-046  | VICTORIA F.A         | Temperate japonica | Intro          | 25.95476  |
| RWG-135  | Milyang88            | Temperate japonica | Bred           | 24.32664  |
| RWG-111  | XaoBaiMangSueDao     | Temperate japonica | Intro          | 24.01458  |
| RWG-085  | MILYANG 50           | Indica             | Bred           | 23.54316  |
| RWG-086  | YeongpungByeo        | Indica             | Bred           | 23.00765  |
| RWG-022  | SEON                 | Indica             | Landrace       | 22.37643  |
| RWG-081  | AKAINE               | Tropical japonica  | Intro          | 21.02273  |
| RWG-070  | QUA 77 WUAN-DAU      | Indica             | Intro          | 20.93916  |
| RWG-053  | KAGI                 | Aus                | Intro          | 20.82313  |
| RWG-137  | IR40                 | Indica             | Intro          | 20.70115  |
| RWG-099  | JwiippariByeo        | Temperate japonica | Landrace       | 20.17702  |
| RWG-097  | Seorianjeunbaengi    | Temperate japonica | Landrace       | 19.71935  |
| RWG-094  | Jotajo               | Temperate japonica | Landrace       | 19.49459  |
| RWG-069  | KENG CHI JU          | Temperate japonica | Intro          | 19.10331  |
| RWG-119  | SAN-LI-SHUN          | Indica             | Intro          | 18.45199  |
| RWG-036  | CHIEM CHANK          | Indica             | Intro          | 18.23778  |
| RWG-002  | SUWEON 159           | Temperate japonica | Bred           | 17.93188  |

|         |                         |                    |          |          |
|---------|-------------------------|--------------------|----------|----------|
| RWG-033 | ANBAW C7                | Temperate japonica | Intro    | 17.11806 |
| RWG-104 | Naengjo                 | Temperate japonica | Landrace | 15.41527 |
| RWG-121 | Chungdo23               | Indica             | Weedy    | 14.95007 |
| RWG-016 | Dadajo                  | Temperate japonica | Landrace | 14.84905 |
| RWG-026 | JANMOCHAL               | Temperate japonica | Landrace | 14.81522 |
| RWG-065 | SSALBYEO 22             | Temperate japonica | Weedy    | 14.29224 |
| RWG-072 | HSIANG-HA-TSAN          | Indica             | Intro    | 14.22287 |
| RWG-012 | Jejubukjeju-2002-420    | Temperate japonica | Weedy    | 13.99593 |
| RWG-045 | TUN SART                | Tropical japonica  | Intro    | 13.73697 |
| RWG-032 | AGBEDE                  | Tropical japonica  | Intro    | 13.02982 |
| RWG-056 | WAIKYAKUSHI             | Indica             | Intro    | 12.60006 |
| RWG-042 | MUSHKAN                 | admixture          | Intro    | 12.36595 |
| RWG-089 | MOROBEREKAN             | Tropical japonica  | Intro    | 12.23355 |
| RWG-096 | DongoByeo               | Temperate japonica | Landrace | 12       |
| RWG-040 | MAGNOLIA                | Tropical japonica  | Intro    | 11.99478 |
| RWG-095 | PocheonJangmangMebyeon  | Temperate japonica | Landrace | 11.91292 |
| RWG-009 | Jejubukjeju-2002-9      | Temperate japonica | Weedy    | 11.85542 |
| RWG-093 | Huindadak               | Temperate japonica | Landrace | 11.76471 |
| RWG-123 | ChungdoHwayang14        | Indica             | Weedy    | 11.60586 |
| RWG-076 | Danyang-7               | Temperate japonica | Weedy    | 10.96982 |
| RWG-112 | Dijiaowujian            | Indica             | Intro    | 9.996202 |
| RWG-005 | Suweon 347              | Indica             | Bred     | 9.98785  |
| RWG-011 | Jejubukjeju-2002-340    | Temperate japonica | Weedy    | 9.864573 |
| RWG-037 | DHARIAL                 | Aus                | Intro    | 9.389671 |
| RWG-131 | Suhyeonghando           | Indica             | Intro    | 9.31601  |
| RWG-084 | Syalebyeo-163-1-B       | Temperate japonica | Weedy    | 8.571064 |
| RWG-075 | Golyeong-6              | Temperate japonica | Weedy    | 7.647731 |
| RWG-091 | Jejubukjeju-2002-55     | Temperate japonica | Weedy    | 7.519715 |
| RWG-019 | Batnarak                | Tropical japonica  | Landrace | 6.666667 |
| RWG-100 | Jeongjonghwa            | Temperate japonica | Landrace | 5.99882  |
| RWG-014 | kanghwasujip-16         | Temperate japonica | Weedy    | 5.619413 |
| RWG-132 | Xiaozaohuang            | Tropical japonica  | Intro    | 5.432641 |
| RWG-136 | Dudo                    | Temperate japonica | Landrace | 5.024337 |
| RWG-126 | Suncheon 5              | Indica             | Weedy    | 4.964539 |
| RWG-087 | IRI 336                 | Temperate japonica | Bred     | 4.671101 |
| RWG-001 | NAMSEON 52              | Temperate japonica | Bred     | 4.451981 |
| RWG-047 | BaiCyueHwaLue           | Indica             | Intro    | 4.146844 |
| RWG-074 | Golyeong-2              | Temperate japonica | Weedy    | 3.786948 |
| RWG-113 | SPIN MERE               | Aus                | Intro    | 3.333333 |
| RWG-106 | BRITISH HONDURAS CREALE | Tropical japonica  | Intro    | 3.050221 |
| RWG-041 | MALA                    | Indica             | Intro    | 2.884703 |
| RWG-108 | SAHAK                   | Aus                | Intro    | 2.791839 |
| RWG-117 | SUNG PAN TAO            | Temperate japonica | Intro    | 2.777778 |

|         |                      |                    |          |          |
|---------|----------------------|--------------------|----------|----------|
| RWG-092 | Jejubukjeju-2002-561 | Temperate japonica | Weedy    | 2.563194 |
| RWG-114 | NORIN 22             | Temperate japonica | Intro    | 2.301587 |
| RWG-116 | NIAN CHI SHI         | Indica             | Intro    | 1.958422 |
| RWG-082 | Syarebyeo-61-1-B     | Temperate japonica | Weedy    | 1.929005 |
| RWG-124 | Seongju3             | Indica             | Weedy    | 1.903798 |
| RWG-109 | TAICHUNG-WOO-TSAN    | Indica             | Intro    | 1.86267  |
| RWG-128 | Guechang15           | Temperate japonica | Weedy    | 1.81686  |
| RWG-064 | HAWM SUPAN           | Indica             | Intro    | 1.785714 |
| RWG-027 | Pyodo                | Temperate japonica | Landrace | 1.709402 |
| RWG-010 | Jejubukjeju-2002-171 | Indica             | Weedy    | 1.574803 |
| RWG-088 | MihyangByeo          | Temperate japonica | Bred     | 1.511821 |
| RWG-083 | Syalebyeo-94-1-B     | Temperate japonica | Weedy    | 1.504024 |
| RWG-073 | Cheongdo-donggok-4   | Indica             | Weedy    | 1.449275 |
| RWG-006 | CT9993-5-10-1-M      | Indica             | Intro    | 1.166858 |
| RWG-030 | BAEKGOGNA            | Indica             | Landrace | 1.071429 |
| RWG-068 | YUNG YUEN CHUEN ZIM  | Indica             | Intro    | 1.020408 |
| RWG-058 | NEWREX               | Tropical japonica  | Intro    | 0.941467 |
| RWG-051 | YUPUL                | Tropical japonica  | Intro    | 0.939166 |
| RWG-129 | Danyang9             | Temperate japonica | Weedy    | 0.884956 |
| RWG-127 | Daegu damti 6-2      | Temperate japonica | Weedy    | 0.864109 |
| RWG-105 | BIKOM                | admixture          | Intro    | 0.8      |
| RWG-017 | OKCHEONG             | Temperate japonica | Landrace | 0.75188  |
| RWG-134 | NAMSEON 126          | Temperate japonica | Bred     | 0.724638 |
| RWG-024 | Inbujido             | Temperate japonica | Landrace | 0.657895 |
| RWG-057 | UPLAND               | Tropical japonica  | Intro    | 0.60241  |
| RWG-130 | Chungsongaengmi4     | Temperate japonica | Weedy    | 0.45045  |
| RWG-013 | Jeju collection      | Indica             | Weedy    | 0        |
| RWG-044 | RED RICE             | Indica             | Intro    | 0        |
| RWG-054 | HATADANI             | Indica             | Intro    | 0        |
| RWG-025 | Beobpanhwa           | Temperate japonica | Landrace | 0        |
| RWG-077 | Danyang-38           | Temperate japonica | Weedy    | 0        |
| RWG-133 | NAMSEON 34           | Temperate japonica | Bred     | 0        |
| RWG-055 | TAI MOCHITO          | Tropical japonica  | Intro    | 0        |

---
