# Supplementary material for: Genome-Wide Association Study Reveals the Genetic Basis of Chilling Tolerance in Rice at the Reproductive Stage
Source: Plants (Basel). 2021 Aug 20;10(8):1722. doi: 10.3390/plants10081722 (PMC8398597; doi:10.3390/plants10081722)
Supplement: Supplementary file 1 [file plants-10-01722-s001.zip › supplymentary table 2.pdf]

| Candidate gene | p-value      | haplotype | accession | mean     |
|----------------|--------------|-----------|-----------|----------|
| Os03g0293600   | 0.008286     | hap1      | 28        | 19.83602 |
|                |              | hap2      | 78        | 12.1916  |
| Os03g0299800   | 0.046701     | hap1      | 77        | 13.25845 |
|                |              | hap2      | 7         | 3.632587 |
| Os03g0305100   | 0.027405     | hap1      | 11        | 5.895067 |
|                |              | hap2      | 105       | 14.9299  |
| Os03g0305700   | 0.021188     | hap1      | 11        | 5.036729 |
|                |              | hap2      | 28        | 17.68908 |
|                |              | hap3      | 59        | 14.30581 |
| Os03g0308100   | 0.038766     | hap1      | 67        | 14.98514 |
|                |              | hap2      | 16        | 7.53365  |
| Os03g0311600   | 0.035177     | hap1      | 8         | 20.15117 |
|                |              | hap2      | 8         | 3.534199 |
|                |              | hap3      | 55        | 14.4928  |
| Os06g0493801   | 0.013151     | hap1      | 2         | 3.062586 |
|                |              | hap2      | 8         | 22.92597 |
|                |              | hap3      | 49        | 11.19535 |
|                |              | hap4      | 3         | 5.501724 |
|                |              | hap5      | 11        | 20.55742 |
| Os06g0494000   | 0.018717     | hap1      | 44        | 17.56909 |
|                |              | hap2      | 73        | 11.77322 |
| Os06g0494100   | 0.005486     | hap1      | 2         | 3.062586 |
|                |              | hap2      | 40        | 19.12631 |
|                |              | hap3      | 74        | 11.62493 |
| Os06g0494400   | 0.022423     | hap1      | 2         | 3.062586 |
|                |              | hap2      | 5         | 11.65349 |
|                |              | hap3      | 10        | 17.85106 |
|                |              | hap4      | 2         | 6.182975 |
|                |              | hap5      | 48        | 10.30353 |
|                |              | hap6      | 6         | 26.90764 |
| Os06g0495100   | 0.0000000002 | hap1      | 61        | 12.01783 |
|                |              | hap2      | 28        | 27.3125  |
|                |              | hap3      | 8         | 9.694598 |
|                |              | hap4      | 2         | 2.967462 |
|                |              | hap5      | 10        | 1.356132 |
|                |              | hap6      | 3         | 0.000001 |
| Os06g0495500   | 0.044923     | hap1      | 3         | 5.501724 |
|                |              | hap2      | 15        | 15.01718 |
|                |              | hap3      | 55        | 10.07418 |
|                |              | hap4      | 7         | 21.92041 |

|              |          |      |     |          |
|--------------|----------|------|-----|----------|
| Os06g0495700 | 0.033277 | hap1 | 8   | 23.46438 |
|              |          | hap2 | 28  | 17.46683 |
|              |          | hap3 | 3   | 10.48975 |
|              |          | hap4 | 70  | 11.76322 |
| Os06g0497500 | 0.026556 | hap1 | 11  | 19.25928 |
|              |          | hap2 | 72  | 11.66356 |
|              |          | hap3 | 19  | 19.2096  |
| Os06g0498500 | 0.02358  | hap1 | 8   | 20.42438 |
|              |          | hap2 | 2   | 3.062586 |
|              |          | hap3 | 29  | 18.51895 |
|              |          | hap4 | 72  | 11.45986 |
| Os06g0498900 | 0.017959 | hap1 | 2   | 3.062586 |
|              |          | hap2 | 74  | 11.71374 |
|              |          | hap3 | 5   | 26.2962  |
| Os06g0499000 | 0.015496 | hap1 | 10  | 22.61646 |
|              |          | hap2 | 33  | 16.57198 |
|              |          | hap3 | 74  | 11.62493 |
| Os06g0499550 | 0.167239 | hap1 | 8   | 20.0137  |
|              |          | hap2 | 6   | 12.36236 |
|              |          | hap3 | 23  | 16.67147 |
|              |          | hap4 | 70  | 11.51564 |
| Os06g0500100 | 0.034982 | hap1 | 101 | 12.83605 |
|              |          | hap2 | 6   | 26.5284  |
|              |          | hap3 | 6   | 12.36236 |
| Os06g0500300 | 0.014102 | hap1 | 76  | 11.81034 |
|              |          | hap2 | 41  | 17.94388 |
| Os06g0500700 | 0.003817 | hap1 | 73  | 12.03401 |
|              |          | hap2 | 22  | 16.92117 |
|              |          | hap3 | 6   | 29.03965 |
| Os07g0137800 | 0.014819 | hap1 | 5   | 24.11694 |
|              |          | hap2 | 51  | 10.53287 |
| Os07g0150200 | 0.008944 | hap1 | 6   | 4.151038 |
|              |          | hap2 | 86  | 12.89765 |
|              |          | hap3 | 22  | 20.33397 |
| Os07g0150500 | 0.017033 | hap1 | 28  | 19.00924 |
|              |          | hap2 | 86  | 12.2751  |
| Os07g0150700 | 0.01128  | hap1 | 29  | 19.16558 |
|              |          | hap2 | 87  | 12.14418 |
| Os07g0151200 | 0.015088 | hap1 | 7   | 13.49861 |
|              |          | hap2 | 16  | 22.33665 |
|              |          | hap3 | 70  | 12.02965 |

Supplementary table 2. The 26 candidate genes.
